# Supplementary material
Source: PubMed Central journal article supplement (PMC2993416)
Supplement: 1007653107_pnas.1007653107_SI.pdf [file 1007653107_pnas.1007653107_SI.pdf]

# Supporting Information

Fokina et al. 10.1073/pnas.1007653107

## SI Materials and Methods

**Overexpression and Purification of Recombinant P<sub>II</sub> and N-Acetyl-Glutamate Kinase (NAGK).** The R9L and K58M variants were created with artificial *glnB* genes carrying the respective mutations and cloned into the Strep-tag fusion vector pASK-IBA3 (IBA) after restriction with BsaI as described previously (1). Overexpression of wild-type and mutant *Synechococcus elongatus glnB* in *Escherichia coli* RB9060 (2) and purification of recombinant P<sub>II</sub> proteins with a C-terminal fused Strep-tag II peptide was performed according to Heinrich et al. (1). His<sub>6</sub>-tagged recombinant NAGK from *S. elongatus* was overexpressed in *E. coli* strain BL21(DE3) (3) and purified as reported previously (4).

**Surface Plasmon Resonance Detection (SPR).** SPR experiments were performed using a BIAcore X biosensor system (Biacore AB) at 25 °C in HEPES-buffered saline (HBS)-Mg buffer containing 10 mM HEPES, 150 mM NaCl, 1 mM MgCl<sub>2</sub>, and 0.005% Nonidet P-40, pH 7.5 at a flow rate of 15 μL/min as described previously (4). The purified His<sub>6</sub>-NAGK was immobilized on the Ni<sup>2+</sup>-loaded nitrilotriacetate (NTA) sensor chip to flow cell 2 (FC2) in a volume of 50 μL at a concentration of 30 nM (hexamer) to receive a binding signal of approximately 3,000 resonance units (RU), which corresponds to a surface concentration change of 3 ng/mm<sup>2</sup>.

In order to analyze the effect of 2-oxoglutarate (2-OG) on the dissociation of WT P<sub>II</sub>-NAGK complex, 100 nM P<sub>II</sub> was bound to the His<sub>6</sub>-NAGK and then the analyte containing 1 mM ATP and different concentrations of 2-OG diluted in HBS-Mg buffer (50 μL) was injected to both FC1 and FC2 on the sensor chip. The specific binding of P<sub>II</sub> to NAGK and dissociation was recorded as the response signal difference FC2-FC1.

P<sub>II</sub> was removed from the His<sub>6</sub>-NAGK surface by injecting 25 μL of 1 mM ADP. For novel reload of proteins on the NTA sensor chip, 25 μL of 0.4 M EDTA pH 7.5 was injected to remove His<sub>6</sub>-NAGK and Ni<sup>2+</sup>. Subsequently, the chip could be loaded again with 5 mM Ni<sub>2</sub>SO<sub>4</sub> solution and His<sub>6</sub>-NAGK as described above.

**Isothermal Titration Calorimetry (ITC).** ITC experiments were performed on a VP-ITC microcalorimeter (MicroCal, LCC) in buffer containing 10 mM HEPES-NaOH, pH 7.4, 50 mM KCl, 50 mM NaCl, and 1 mM MgCl<sub>2</sub> at 20 °C. For determination of ATP- and 2-OG-binding isotherms for P<sub>II</sub> variants R9L and K58M, different amounts of protein solution (16, 25, or 33 μM trimer concentration) were titrated with 1 mM ATP or 4 mM 2-OG (in the presence of 1 mM ATP). For one measurement 5 μL ligand was injected 35 times in 1.4285 mL cell with stirring at 350 rpm. The binding isotherms were calculated from received data and fitted to a three-site binding model using the MicroCal ORIGIN software (Northampton) as indicated.

**Coupled NAGK Activity Assay.** Activity of NAGK was determined by coupling NAG phosphorylation via pyruvate kinase and lactate dehydrogenase to the oxidation of NADH. The assay was performed as described previously, the reaction buffer consisting of 50 mM imidazole, pH 7.5, 50 mM KCl, 20 mM MgCl<sub>2</sub>, 0.4 mM NADH, 1 mM phosphoenolpyruvate, 10 mM ATP, 0.5 mM DTT, 11 U lactate dehydrogenase, 15 U pyruvate kinase, 50 μM arginine, 1.2 μg P<sub>II</sub>, and 3 μg NAGK (5). The mixture was preincubated for 3 min to allow P<sub>II</sub>-NAGK complex formation. Then, the reaction was started by the addition of 50 mM NAG and 2-OG (to determine the effect of increasing 2-OG concentrations on disruption of P<sub>II</sub>-NAGK complex in the presence of NAGK-inhibiting concentrations of arginine). Then 20 s after addition of substrate, the change in absorbance at 340 nm was recorded for 10 min. Linear kinetics were observed over the period of time. Phosphorylation of one molecule of NAG leads to oxidation of one molecule of NADH, which is followed by the linear decrease of absorbance at 340 nm. The reaction was recorded in a SPECORD 200 photometer (Analytik Jena). The reaction velocity was calculated from the slope of the resulting time curve as change in absorbance per time with one unit of NAGK ( $\epsilon_{340} = 6,178 \text{ L mol}^{-1} \text{ cm}^{-1}$ ) catalyzing the conversion of 1 mmol NAG per min.

**Crystallization of Recombinant *S. elongatus* P<sub>II</sub> Protein.** Crystallization was performed with the sitting-drop technique by mixing 400 nL of the protein solution with equal amounts of the reservoir solution using the honeybee robot (Genomic Solutions Ltd.). Drops were incubated at 20 °C and pictures were recorded by the RockImager system (Formulatrix). The crystallization buffer was composed of 10 mM Tris (pH 7.4), 0.5 mM EDTA, 100 mM NaCl, 1% glycerol, and 2 mM ATP-Mg, and also 2 mM 2-OG was added; crystals appeared in a precipitant condition containing PEG 4000. Glycerol was used as the cryoprotectant and the crystals were flash-frozen in liquid nitrogen. Diffraction data were collected at the Swiss Light Source. Diffraction images were recorded on a MarCCD camera 225 (Marresearch) and images were processed using the XDS/XSCALE software (6). The structure was solved by molecular replacement using the program Molrep (7). Rebuilding of the structure and structure refinement was performed using the programs Coot and Refmac (8, 9). The quality of the structure was analyzed by the Procheck program (10). Figures were generated using PyMOL ([www.pymol.org](http://www.pymol.org)).

For crystallization of P<sub>II</sub><sup>OG1-3</sup> structures, 2-OG-containing P<sub>II</sub> protein was used. Crystals appeared after 30 d in a precipitant condition containing sodium acetate trihydrate 0.1 M, pH 5, PEG 4000, and 2-methyl-2,4-pentanediol.

1. Heinrich A, Maheswaran M, Ruppert U, Forchhammer K (2004) The *Synechococcus elongatus* P<sub>II</sub> signal transduction protein controls arginine synthesis by complex formation with N-acetyl-L-glutamate kinase. *Mol Microbiol* 52:1303–1314.
2. Bueno R, Pahel G, Magasanik B (1985) Role of *glnB* and *glnD* gene products in regulation of the *glnALG* operon of *Escherichia coli*. *J Bacteriol* 164:816–822.
3. Studier FW, Rosenberg AH, Dunn JJ, Dubendorff JW (1990) Use of T7 RNA polymerase to direct expression of cloned genes. *Methods Enzymol* 185:60–89.
4. Maheswaran M, Urbanke C, Forchhammer K (2004) Complex formation and catalytic activation by the P<sub>II</sub> signaling protein of N-acetyl-L-glutamate kinase from *Synechococcus elongatus* strain PCC 7942. *J Biol Chem* 279:55202–55210.
5. Beez S, Fokina O, Herrmann C, Forchhammer K (2009) N-acetyl-L-glutamate kinase (NAGK) from oxygenic phototrophs: P<sub>II</sub> signal transduction across domains of life reveals novel insights in NAGK control. *J Mol Biol* 389:748–758.
6. Kabsch W (2010) XDS. *Acta Crystallogr, Sect D: Biol Crystallogr* 66:125–132.
7. Vagin A, Teplyakov A (1997) MOLREP: An automated program for molecular replacement. *J Appl Crystallogr* 30:1022–1025.
8. Murshudov GN, Vagin AA, Dodson EJ (1997) Refinement of macromolecular structures by the maximum-likelihood method. *Acta Crystallogr, Sect D: Biol Crystallogr* 53:240–255.
9. Emsley P, Cowtan K (2004) Coot: Model-building tools for molecular graphics. *Acta Crystallogr, Sect D: Biol Crystallogr* 60:2126–2132.
10. Laskowski RA, MacArthur MW, Moss DS, Thornton JM (1993) Procheck—a program to check the stereochemical quality of protein structures. *J Appl Crystallogr* 26:283–291.

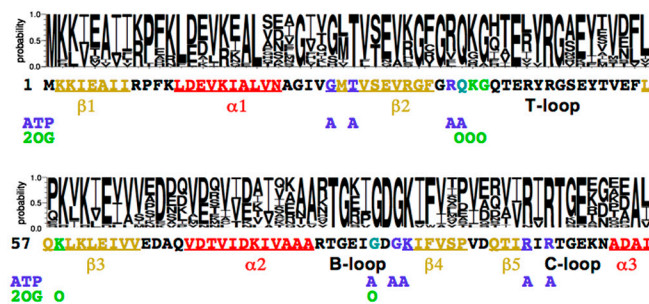

**Fig. S1.** Primary and secondary structure of the *S. elongatus* P<sub>II</sub> protein with representation of sequence conservation and indication of amino acids, involved in ATP and 2-OG binding. Below the amino acid sequence of the *S. elongatus* P<sub>II</sub> protein (middle line), the secondary structure elements and T, B, and C loops are indicated;  $\alpha$ -helices and  $\beta$ -strands are underlined and colored in the red or in brown, respectively. The position of amino acids involved in ATP binding (blue), 2-OG binding (green), or both (cyan) are highlighted with A or O (the coloring of these amino acids overrides the coloring of secondary structure elements). On top, the amino acid sequence conservation is represented as a sequence logo, derived from multiple sequence alignment of 14 different P<sub>II</sub> proteins from the major prokaryotic lineages. The sequence logo was created with the program WebLogo 3.0. (<http://weblogo.threeplusone.com/>). The frequency of an amino acid in the multiple alignment is represented by the height of the letter. Multiple sequence alignment was carried out with the program ClustalW (<http://www.ebi.ac.uk/Tools/clustalw2/>) using the following P<sub>II</sub> sequences (Gene Bank accession numbers in parentheses): *S. elongatus* (YP\_171902.1); *Nostoc* sp. strain 7120 (BAB74018.1); *Prochlorococcus marinus* MIT 9301 (YP\_001091877.1); *Thiobacillus denitrificans* ATCC25259 (AAZ96761.1); *E. coli* GlnB (AAB28779.1); *E. coli* GlnK (CAQ30923.1); *Azospirillum brasiliense* GlnB (AAK01659.1); *A. brasiliense* GlnK (ADK11050.1); *A. brasiliense* GlnZ (AAG10012.1); *Bacillus subtilis* GlnK (AAA17400.1); *Lactococcus lactis* subsp. *cremoris* MG1363 (AAX82491.1); *Streptomyces coelicolor* A3 (NP\_733668.1); *Methanocaldococcus maripaludis* GlnB (CAF29622.1); *Methanocaldococcus jannaschii* DSM 2661 GlnB (AAB98041.1).

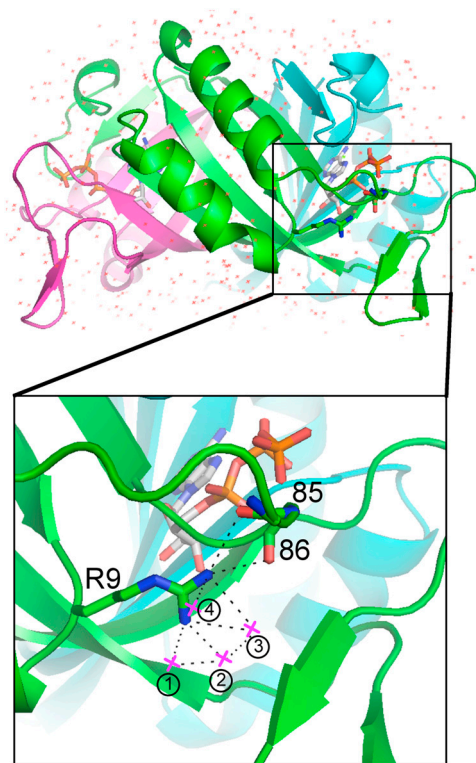

**Fig. S2.** Role of R9 residue in stabilizing the active site of P<sub>II</sub> in the NAGK-binding conformation. Ribbon presentation of the structure of the P<sub>II</sub> 186N variant (mimicking the NAGK-binding conformation) with unbound water molecules. ATP and relevant side- or main-chain residues are shown in sticks; black broken lines indicate contacts between R9 and main-chain oxygens of B-loop residues or water molecules that are designated 1, 2, 3, and 4. One of these water molecules (2) makes contact with T-loop backbone oxygen of R45 (2.80 Å), water 3 with the carboxyl group of E85 (2.83 Å), and water 4 also with E85 (2.66 Å) and the hydroxyl group of T83 (2.84 Å).





**Table S2. Molecular interface analysis of the subunits in the  $P_{II}^{OG1-3}$  structure (values are given in  $\text{\AA}^2$ )**

|                | A     | B     | C     |
|----------------|-------|-------|-------|
| $P_{II}^{OG1}$ |       |       |       |
| A              |       | 1,200 | 1,180 |
| B              | 1,200 |       | 1,070 |
| C              | 1,180 | 1,070 |       |
| $P_{II}^{OG2}$ |       |       |       |
| A              |       | 1,210 | 1,190 |
| B              | 1,210 |       | 1,090 |
| C              | 1,190 | 1,090 |       |
| $P_{II}^{OG3}$ |       |       |       |
| A              |       | 1,260 | 1,250 |
| B              | 1,260 |       | 1,160 |
| C              | 1,250 | 1,160 |       |
